# Supplementary material for: Metabolic and physiological interdependencies in the Bathymodiolus azoricus symbiosis
Source: PubMed Central journal article supplement — ISME J. 2016 Nov 1;11(2):463–77. doi: 10.1038/ismej.2016.124 (PMC5270565; doi:10.1038/ismej.2016.124), 2016-11-01
Supplement: ismej2016124x1.pdf [file ismej2016124x1.pdf]

## Supplementary Online Material

### Metabolic and physiological interdependencies in the *Bathymodiolus azoricus* symbiosis

Ruby Ponnudurai<sup>1\*</sup>, Manuel Kleiner<sup>2\*</sup>, Lizbeth Sayavedra<sup>3</sup>, Jillian M. Petersen<sup>3,4</sup>, Martin Moche<sup>5</sup>, Andreas Otto<sup>5</sup>, Dörte Becher<sup>5</sup>, Takeshi Takeuchi<sup>6</sup>, Noriyuki Satoh<sup>6</sup>, Nicole Dubilier<sup>3</sup>, Thomas Schweder<sup>1,7</sup> and Stephanie Markert<sup>1,7</sup>

<sup>1</sup>Ernst-Moritz-Arndt-University, Institute of Pharmacy, Greifswald, Germany

<sup>2</sup>University of Calgary, Department of Geoscience, Calgary, Canada

<sup>3</sup>Max-Planck-Institute for Marine Microbiology, Department of Symbiosis, Bremen, Germany

<sup>4</sup>University of Vienna, Division of Microbial Ecology, Vienna, Austria

<sup>5</sup>Ernst-Moritz-Arndt-University, Institute of Microbiology, Greifswald, Germany

<sup>6</sup>Okinawa Institute of Science and Technology, Marine Genomics Unit, Okinawa, Japan

<sup>7</sup>Institute of Marine Biotechnology, Greifswald, Germany

\*These two authors contributed equally to this work.

Correspondence: [stephanie.markert@uni-greifswald.de](mailto:stephanie.markert@uni-greifswald.de)

#### Contents

|                                           |    |
|-------------------------------------------|----|
| Supplementary Methods.....                | 2  |
| Supplementary Results and Discussion..... | 13 |
| References.....                           | 27 |

1 The following tables and figures are provided as separate files:

2

3 Supplementary Table S1: A) Replicate numbers of all analyses performed in this study

4 B) Overview of MS measurements

5 Supplementary Table S2: A) List of all genomes in the *B. azoricus* protein database

6 B) Genomes of *Bathymodiolus* symbionts in the database

7 C) Number of protein identifications in MS analyses

8 Supplementary Table S3: A) Relative abundance of all identified proteins (average)

9 B) Relative abundance in NSAF % (all replicates)

10 C) Relative abundance in OrgNSAF % (all replicates)

11 Supplementary Table S4: A) Symbiosis-specific host proteins (expression ratios)

12 B) Symbiosis-specific host proteins (significance tests)

13 Supplementary Table S5: A) CRISPR-Cas and R-M genes in both symbionts

14 B) Genes encoding CRISPR repeats in the thiotroph

15

16

17 Supplementary Figure S1: Proportion of symbionts and host in enriched fractions

18 Supplementary Figure S2: Energy-generating pathways in *B. azoricus* symbionts

19 Supplementary Figure S3: Methane and formaldehyde oxidation in the methanotroph

20 Supplementary Figure S4: Nitrogen metabolism in the thiotrophic symbiont

21 Supplementary Figure S5: Genes and proteins involved in amino acid and cofactor synthesis

22

23

## 1 **Supplementary Methods**

2 Sampling sites, sampling times and replicate numbers of all analyses performed in this study  
3 are summarized in Supplementary Table S1A.

### 4 *Sampling and sequencing of the methane-oxidizing symbionts from B. azoricus and* 5 *Bathymodiolus sp. mussels*

6 DNA extraction and sequencing of the methane-oxidizing (MOX) symbiont of *B. azoricus* was  
7 done as described previously by Sayavedra *et al.* and the MOX symbiont sequences were  
8 obtained by binning from the metagenome (Sayavedra *et al.*, 2015). Briefly, a *B. azoricus*  
9 mussel was collected at the Mid-Atlantic Ridge (MAR) Menez Gwen vent field at 37°45'35" N,  
10 31°38'15.6" W during the MoMARETO cruise. DNA of the adductor muscle was extracted  
11 using a CTAB/PVP extraction procedure (2 % CTAB, 1 % PVP, 1.4 M NaCl, 0.2 % β-  
12 mercaptoethanol, 100 mM Tris HCl pH 8, 0.1 mg ml<sup>-1</sup> proteinase K). DNA was sequenced by  
13 OIST with 454-Titanium. The assembly was done with Newbler v.2.7 (454 Life Sciences  
14 Corporation) as described by Takeuchi and colleagues (Takeuchi *et al.*, 2012) resulting in  
15 644,000 contigs of a total length of 510,449,434 bp. Sequences from the MOX symbiont were  
16 binned with Metawatt V. 1.7 (Strous *et al.*, 2012). Only sequences longer than 800 bp were  
17 considered for further analyses.

18 Two *Bathymodiolus sp.* individuals were collected, one from the southern MAR Lilliput vent at  
19 09°32'50.9" S, 13°12'33.3" W at the station ME782/335 and one at the Foggy Corner vent at  
20 4°48'9.7" S, 12°22'16.79" W at the station ME782/274 during the RV Meteor cruise M78-2. Gill  
21 tissue of the *Bathymodiolus sp.* mussel from Lilliput was frozen at -20 °C and ground in the  
22 home laboratory with a glass tissue homogenizer. A gill sample of the *Bathymodiolus sp.*  
23 mussel from Foggy Corner was homogenized on board and stored in 70 % ethanol at -20 °C.  
24 Homogenates were centrifuged at low speed (18 min, 20 x g, 4 °C) using a swing-out rotor and  
25 the resultant supernatants were filtered through 8 μm GTTP filters (Millipore). 200 μl of the  
26 filtrate were centrifuged at high speed (5 min, 3500 x g, 4°C), and the resultant pellet  
27 resuspended in 0.1 M HCl in artificial seawater (ASW). ASW was prepared as described by

1 Widdel and Pfennig (1981), supplemented with a trace element mixture as described by Widdel  
2 *et al.* (1983). The sample was incubated for 10 min at room temperature (RT), centrifuged (5  
3 min, 3500 x g, 4 °C) and the resultant pellet was resuspended in 500 µl ASW followed by  
4 another brief centrifugation (1 min, 3500 x g, 4 °C). To facilitate the isolation of the symbionts  
5 by FACS, the 16S rRNA of the MOX symbiont was labeled with catalyzed reporter deposition-  
6 fluorescence *in situ* hybridization (CARD-FISH) with the probe BMARm-845 as previously  
7 described (Pernthaler *et al.*, 2002; Duperron *et al.*, 2006) with the following modifications:  
8 Homogenates were hybridized for 2 h at 46 °C using hybridization buffer containing 30 %  
9 formamide. Hybridized cells were washed using 1 ml pre-warmed washing-buffer (70 mM  
10 NaCl, 5 mM EDTA pH 8, 20 mM Tris-HCl, 0.1 % SDS) and centrifuged (5 min, 3500 x g, RT).  
11 After removing the supernatant, the samples were incubated in 1 ml pre-warmed washing-  
12 buffer (15 minutes at 48 °C), followed by a centrifugation step (5 min, 3500 x g, RT). For signal  
13 amplification, we incubated the resultant pellets in a solution containing 1x PBS, 0.0015 %  
14 H<sub>2</sub>O<sub>2</sub> and 0.33 µg ml<sup>-1</sup> Alexa Fluor® 488-labeled tyramides (46 °C, 30 min). Samples were  
15 washed twice using 1 ml of ASW followed by centrifugation (5 min, 3500 x g, RT). The washed  
16 pellets were resuspended in 100 µl ASW. Symbiont cells were isolated by FACS (MoFlo;  
17 Cytomation). DNA from the sorted methanotrophic symbiont cells was amplified by Multiple  
18 Displacement Amplification (MDA) using the GenomiPhi V2 Illustra MDA Kit (GE Healthcare)  
19 according to the manufacturer's instructions. The products were screened with PCR using the  
20 general bacterial primers GM3 and GM4 (Muyzer *et al.*, 1995). The 16S rRNA products of  
21 MOX symbionts from both *Bathymodiolus* sp. individuals were identical, so the MDA products  
22 were pooled for a second reaction of MDA amplification using the GenomiPhi HY Illustra MDA  
23 Kit (GE Healthcare). DNA was sequenced at Genoscope (France) with 454-Titanium FLX.  
24 1299554 reads were generated and assembled with Newbler v. 2.7 (454 Life Sciences  
25 Corporation) resulting in 5123 contigs. The genome assemblies of the methanotrophic  
26 symbiont of *B. azoricus* and of the methanotrophic symbiont of *Bathymodiolus* sp. were  
27 submitted to NCBI and are available under the BioProject accession numbers PRJEB13769  
28 and PRJEB13047, respectively. [Reviewers can access the data using the following link:

1 [https://groupware.uni-](https://groupware.uni-greifswald.de/index.php?r=files/file/download&id=681780&random_code=b284JduEyMN&inline=false&security_token=jsydMmQcRkvtFLrIKfz8.)  
2 [greifswald.de/index.php?r=files/file/download&id=681780&random\\_code=b284JduEyMN&inli](https://groupware.uni-greifswald.de/index.php?r=files/file/download&id=681780&random_code=b284JduEyMN&inline=false&security_token=jsydMmQcRkvtFLrIKfz8.)  
3 [ne=false&security\\_token=jsydMmQcRkvtFLrIKfz8.\]](https://groupware.uni-greifswald.de/index.php?r=files/file/download&id=681780&random_code=b284JduEyMN&inline=false&security_token=jsydMmQcRkvtFLrIKfz8.)

4 All other symbiont and host genome sequences used in our study besides the MOX symbionts'  
5 genomes were obtained from published genome projects (see Supplementary Table S2A and  
6 S2B and the database compilation section below).

7 *Separation of symbiont and host fractions from gill tissue using differential pelleting followed*  
8 *by density-gradient rate-zonal centrifugation*

9 Approximately 1 g of *B. azoricus* gill tissue was homogenized in 1x PBS (phosphate buffered  
10 saline: 137 mM NaCl, 2.7 mM KCl, 10 mM Na<sub>2</sub>HPO<sub>4</sub>, 2 mM KH<sub>2</sub>PO<sub>4</sub>) with a Duall<sup>®</sup> homogenizer  
11 (tissue grind pestle and tube SZ22, Kontes Glass Company, Vineland, New Jersey). All steps  
12 were carried out at 4 °C. To remove host nuclei and large tissue fragments, the homogenate  
13 was then transferred to a 15 ml conical tube, filled up to 15 ml with 1x PBS and centrifuged (10  
14 min, 700 x g) in a swing out rotor. To remove any remaining nuclei and tissue fragments from  
15 the resultant supernatant, the centrifugation step was repeated while the pellet (first pellet) was  
16 frozen at -80 °C. The supernatant was then transferred to a new tube and centrifuged in a fixed  
17 angle rotor (10 minutes at 15000 x g) to pellet the symbionts, mitochondria and small tissue  
18 fragments. The supernatant obtained from this step, putatively containing the cytosolic host  
19 proteins, was frozen at -80 °C. A discontinuous density gradient was assembled in 5 % steps  
20 from 5 % to 25 % (w/v) HistoDenz<sup>TM</sup> (Sigma<sup>®</sup> Saint Louis, Missouri, USA) dissolved in 1x  
21 PBS. The symbiont-containing pellet from the previous step was resuspended in 1x PBS,  
22 layered on top of this density gradient, and was centrifuged in a swing out rotor (7 min, 3000 x  
23 g). The density gradient was then disassembled into equal-sized fractions (gradient fractions).  
24 The enriched symbiont pellet in the gradient tube (gradient pellet) was frozen at -80 °C. The  
25 individual gradient fractions were washed twice with 1x PBS to remove the HistoDenz<sup>TM</sup> and  
26 frozen at -80 °C. Throughout the procedure, small subsamples were removed from the  
27 homogenates, pellets, supernatants and gradient fractions of three individual *B. azoricus* hosts

1 (i.e. in biological triplicates) and fixed over-night at 4 °C in 1 % formaldehyde (Fluka,  
2 Taufkirchen, Germany) for subsequent analysis of the sample composition using CARD-FISH  
3 (see Figure 2 in main text).

#### 4 *Assessing symbiont and host composition in density gradient fractions using CARD-FISH*

5 To determine the relative abundance of symbionts in the homogenates, supernatants, pellets  
6 and gradient fractions, catalyzed reporter deposition-fluorescence in-situ hybridization (CARD-  
7 FISH) was used. Subsamples that were fixed over-night were washed three times in 1x PBS  
8 and then stored at -20 °C in 100 µl of a 50 % 1x PBS and 50 % ethanol mix. Prior to CARD-  
9 FISH, the cells were filtered onto GTTP polycarbonate filters with a pore size of 0.2 µm  
10 (Millipore, Billerica, MA). CARD-FISH was done as described previously (Pernthaler *et al.*,  
11 2002) with the minor modification that the inactivation of endogenous peroxidases was done  
12 by incubating the filter discs in 0.01 M HCl for 10 min at room temperature. Double hybridization  
13 of rRNA was performed using the probes BMARt-193 for the thiotroph and BMARm-845 for  
14 the methanotroph (Duperron *et al.*, 2006). Tyramide signal amplification was done at 37 °C for  
15 10 min followed by inactivation of HRP using methanol. Prior to microscopic evaluation, the  
16 cells were counterstained with 1 µg ml<sup>-1</sup> 4',6-diamidino-2-phenylindole (DAPI). Microscopic  
17 analysis and imaging of the CARD-FISH filters were performed using a Zeiss Axioplan  
18 epifluorescence microscope. Cell counting was done semi-automatically using a counting  
19 device developed at the Max Planck Institute for Marine Microbiology, Bremen. To calculate the  
20 relative abundance of thiotrophs, methanotrophs and host cells in each sample, cells with  
21 symbiont-specific probe signal were counted against at least 500 DAPI signals per filter  
22 section. DAPI signals, which did not overlap with the symbiont probe signals, were used as  
23 host cell count. Using this data, two enriched sample types were chosen for further proteomic  
24 analysis: the supernatant, containing soluble host proteins, and the gradient pellet, containing  
25 enriched thiotrophic and methanotrophic symbionts (Supplementary Figure S1).

26

1 *Protein extraction from enriched and whole tissue samples*

2 For the proteomic analyses, two enriched sample types were processed from three animals,  
3 i.e. in three biological replicates: 1) the symbiont-enriched gradient pellet (containing both  
4 symbionts, but particularly enriched in the thiotroph), and 2) the host supernatant, containing  
5 soluble host proteins. Additionally, 3) whole gill tissue and 4) whole mussel foot tissue samples  
6 were processed from the first two animals, i.e. in biological duplicates (see Supplementary  
7 Table S1B for replicate numbers of individual MS measurements). For protein extraction,  
8 gradient pellets were washed and resuspended in lysis buffer (10 mM Tris pH 7.5, 10 mM  
9 EDTA pH 8.0, containing Roche-Complete Mini protease inhibitor cocktail). Tissue samples  
10 were homogenized using a Dual<sup>®</sup> homogenizer and the resultant homogenate was transferred  
11 to low-binding 1.7 ml reaction tubes (Sorenson BioScience Inc., Salt Lake City, UT, USA). All  
12 samples, including the supernatant fractions, were then subjected to sonication using a  
13 sonicator (Bandelin Sonopuls ultrasonic homogenizer, Berlin, Germany; 2 x 25 sec at 30 %  
14 power and a cycle of 0.5 sec and with a 30 sec pause, 4 °C). The lysate was centrifuged to  
15 remove crude cell debris (10 min, 4 °C, 15,300 x g) and the resultant protein raw extracts were  
16 further subjected to ultracentrifugation (60 min, 4 °C, 100,000 x g) allowing for the enrichment  
17 of membranes and membrane-associated proteins in the pellets and of soluble proteins in the  
18 supernatants. Protein concentrations were determined using the method described by  
19 Bradford *et al.* (1976). Aliquots of all four sample types were stored at -80 °C until MS analysis.  
20 The enriched membrane fractions of gill samples and of gradient pellet samples obtained after  
21 ultracentrifugation were further purified according to the protocol of Eymann *et al.* (2004). The  
22 purified membrane protein extracts (solubilized in 30 µl of 50 mM triethylammonium  
23 bicarbonate buffer, pH 7.8) were transferred to low binding 1.7 ml tubes and immediately used  
24 for MS analysis. Due to sample scarcity, the biological replicates (n = 3 for the gradient pellets,  
25 n = 2 for the gill samples) for these membrane protein samples were pooled together to obtain  
26 enough protein for MS analysis.

27

1 **1D-PAGE LC-MS/MS**

2 Proteins from all samples (both membrane and soluble fractions) were separated using 1D-  
3 PAGE. Approximately 20 µg of protein from all membrane- and soluble protein extracts were  
4 dissolved in sample loading buffer (100 mM Tris-HCl pH 6.8, 10 % SDS, 20 % glycerol, 5 %  
5 β-mercaptoethanol, bromophenol blue) and separated on pre-cast 10 % polyacrylamide gels  
6 (Bio-Rad). The gels were fixed and stained with Coomassie Brilliant Blue (G250, Sigma  
7 Aldrich). Each sample lane was cut into 10 equal-sized pieces, thoroughly destained (37 °C,  
8 200 rpm, 200 mM ammonium hydrogen carbonate, 30 % acetonitrile) and briefly vacuum-dried.  
9 Proteins were in-gel digested overnight with trypsin (sequencing grade, Promega) at 37 °C.  
10 Subsequently, peptides were eluted in water using an ultrasonic bath, and purified using  
11 ZipTips (P10, U-C<sub>18</sub>, Millipore). Peptides were separated by liquid chromatography (LC) on an  
12 EASYnLC (Proxeon, Odense, Denmark) with self-packed columns (Luna 3µC18(2) 100A,  
13 Phenomenex, Germany) in a one-column setup. Following loading at a flow rate of 700 nl/min  
14 at a maximum of 220 bar of water in 0.1 % acetic acid, separation of peptides was achieved  
15 by the application of a binary non-linear 70 min gradient from 5 % - 50 % acetonitrile in 0.1 %  
16 acetic acid at a flow rate of 300 nl/min. The eluting peptides were simultaneously analyzed by  
17 coupling the LC online to a mass spectrometer. The soluble protein extract of gradient pellet  
18 and supernatant were each analyzed in two separate measurements a) on an LTQ-Orbitrap  
19 Velos mass spectrometer (Thermo Fisher, Bremen, Germany) and also b) on an LTQ-Orbitrap  
20 Classic mass spectrometer (Thermo Fisher, Bremen, Germany). Soluble protein extracts from  
21 gill and foot tissue samples were analyzed only on the LTQ-Orbitrap Velos mass spectrometer.  
22 All membrane protein extracts were run on the LTQ-Orbitrap Classic mass spectrometer.  
23 During MS measurements, a spray voltage of 2.4 kV was applied in all cases. After a survey  
24 scan (R = 30,000) MS/MS data were recorded for the twenty most intensive precursor ions in  
25 the linear ion trap. Singly charged ions were not taken into account for MS/MS analysis. Lock  
26 mass option was enabled throughout all analyses. After mass spectrometric measurements,  
27 MS data were converted into mzXML format by msconvert (Chambers *et al.*, 2012) followed



1 by database searching. All proteomics raw data are available from the PRIDE  
2 ProteomeXchange repository (see accession details in the database compilation section  
3 below).

#### 4 *Protein identification, validation and quantitation*

5 For identification of host and symbiont proteins, all MS/MS spectra were searched against a  
6 comprehensive protein database (see below for details on database compilation and  
7 Supplementary Table S2A for a list of all organisms whose protein sequences are included)  
8 on a SORCERER™ system (SageN, Milpitas, CA, USA) using the integrated SEQUEST  
9 algorithm (Thermo Fisher Scientific, San Jose, CA, USA; version 27, revision 11) without  
10 charge state deconvolution and de-isotoping. The search was done using the following  
11 parameters: parent mass tolerance 0.0065 Da; fragment ion tolerance 1 Da; up to 2 missed  
12 cleavages allowed (internal lysine and arginine residues), fully tryptic peptides only, and  
13 oxidation of methionine as variable modification (+ 15.99 Da). Scaffold (version 4.0.6.1,  
14 Proteome Software Inc., Portland, OR) was used for filtering and analysis of protein  
15 identifications. The protein identifications were filtered on the basis of their SEQUEST scores  
16 implemented in Scaffold (Keller *et al.*, 2002) using the following thresholds: XCorrs of at least  
17 2.5 (charge +2) and 3.5 (charges > +2), DeltaCN > 0.08 and at least two unique peptides for  
18 each identified protein. The total protein level false discovery rate (FDR) across all samples,  
19 determined according to the method of Käll *et al.* (2008) using the number of identified decoy  
20 sequences that passed the filtering thresholds, was 0.66 %. For relative semi-quantitative  
21 analysis of proteins, normalized spectral abundance factor (NSAF) values were calculated for  
22 each sample (Florens *et al.*, 2006). NSAFs were subsequently also normalized for each  
23 organism (OrgNSAF) individually (Mueller *et al.*, 2010). The respective NSAF values are  
24 presented as percentages of all proteins in the same sample (NSAF %), or of all proteins of  
25 one specific organism in the same sample (OrgNSAF %), respectively. According to their  
26 NSAF % values, proteins of host, thiotrophic symbiont and methanotrophic symbiont were

1 classified as "high", "medium" and "low abundant" (see below for details on protein abundance  
2 threshold).

### 3 *Compilation of the protein database*

4 To create a comprehensive protein database, we included all available sequences pertaining  
5 to host and symbiont, a detailed list of which is given in Supplementary Table S2A. It included  
6 all ORFs from the recently published genome assemblies of the thiotrophic symbionts of *B.*  
7 *azoricus* from Menez Gwen and of *Bathymodiolus* sp. from South-MAR (Sayavedra *et al.*,  
8 2015). Furthermore, all proteins from the newly sequenced genomes of the methanotrophic  
9 symbionts from the same hosts and sampling sites (see above) were included (Supplementary  
10 Table S2B). *B. azoricus* host protein sequences were procured from *B. azoricus* EST libraries  
11 (Bettencourt *et al.*, 2010) in the publicly accessible DeepSeaVent database  
12 (<http://transcriptomics.biocant.pt/deepSeaVent/>). Additionally, protein sequences of  
13 phylogenetically related free-living and symbiotic sulfur-oxidizing Gammaproteobacteria, free-  
14 living methane-oxidizing Gammaproteobacteria and of bivalves related to *B. azoricus* were  
15 retrieved from NCBI and JGI and added to the database. Redundant sequences were removed  
16 using the CD-hit-2D clustering program at 100 % clustering threshold (Li *et al.*, 2001). Amino  
17 acid sequences of common laboratory contaminants (<ftp://ftp.thegpm.org/fasta/cRAP>) were  
18 also added to the database. To determine false discovery rates (FDR) the sequences were  
19 reversed using the decoy.pl perl script ([http://www.matrixscience.com/help/decoy\\_help.html](http://www.matrixscience.com/help/decoy_help.html))  
20 and appended to the database as decoy sequences. The protein sequence database and all  
21 proteome raw data were uploaded to the ProteomeXchange Consortium via the PRIDE  
22 (Vizcaíno *et al.*, 2016) partner repository with the dataset identifier PXD004061 (DOI:  
23 10.6019/PXD004061). [Reviewer access: log in at <http://www.ebi.ac.uk/pride/archive/> with  
24 Username: reviewer26938@ebi.ac.uk and Password: bRkDL3tp].

25

26

### 1 *Determination of NSAF protein abundance cut-offs*

2 Threshold values for high, medium and low abundance of proteins were calculated for host,  
3 thiotroph and methanotroph individually from their respective OrgNSAF % (normalized spectral  
4 abundance factor for individual organisms). For host abundance cut-offs, OrgNSAF % values  
5 from biological replicates of the supernatant samples were averaged, whereas for the  
6 symbionts, OrgNSAF % values from biological replicates of the gradient pellet samples were  
7 averaged. Protein tables were then sorted in decreasing order based on OrgNSAF % averages  
8 and the cumulative OrgNSAF % average was calculate by adding the average OrgNSAF % of  
9 each line to the cumulative average of the previous line. The cumulative OrgNSAF % average  
10 was plotted and cumulative average values corresponding to two elbow points in these curves  
11 were determined. Proteins corresponding to cumulative mean values greater than the first  
12 elbow were designated high abundant, proteins with values between the two elbows were  
13 classified as medium abundant and such proteins with values lower than the second elbow  
14 were designated low abundant.

### 15 *Statistical testing for significant expression differences of putative symbiosis-specific proteins*

16 To identify potentially symbiosis-relevant host and symbiont proteins we performed a statistical  
17 comparison of protein abundances in different sample types (see main text Methods section  
18 for details). Expression ratios were calculated from OrgNSAF % values using the average  
19 across all replicates for the respective sample types (supernatant and gradient pellet: 3 Orbi  
20 replicates and 2 Velos replicates = 5 replicates total, foot and gill samples: 2 Velos replicates,  
21 see also Supplementary Table S1B; membrane fractions were excluded). For statistical  
22 analyses of differences between samples, tables with NSAF or OrgNSAF values of all  
23 replicates and MS analyses were loaded into the Perseus software (version 1.4.1.3,  
24 <http://www.perseus-framework.org/doku.php>). Proteins that did not have at least two or four  
25 (depending on comparison) expression values >0 were removed from the table. All remaining  
26 values were multiplied by 10,000 and log<sub>2</sub>-transformed. Missing values produced by log<sub>2</sub>(0)

1 were replaced by sampling from a normal distribution assuming that the missing values are on  
2 the lower end of abundance (normal distribution parameters in Perseus: width 0.3, down shift  
3 1.8, do separately for each column). A t-test with permutation-based false discovery rate (FDR)  
4 calculation was used to detect proteins that differed significantly in their expression level  
5 between two sample types. The statistical method implemented in Perseus that we used is  
6 based on the "significance analysis of microarrays" described by Tusher *et al.* (2001) which by  
7 using a permutation-based FDR accounts for the multiple-testing problem inherent in testing  
8 for significant expression differences for a large number of genes. The following parameters  
9 were used for the test: sample groupings were only preserved for technical replicates during  
10 randomizations, both sides, 250 randomizations, FDR of 5 % and a variable s0 parameter of  
11 0 to 3.

#### 12 *Prediction of protein properties and assignment of metabolic functions*

13 Each identified protein was checked for the presence of signal peptides and transmembrane  
14 helices using the SignalP (<http://www.cbs.dtu.dk/services/SignalP/>, Petersen *et al.*, 2011b)  
15 and TMHMM (<http://www.cbs.dtu.dk/services/TMHMM/>) servers (Moller *et al.*, 2001). The  
16 PsortB online server (<http://www.psort.org/psortb/>) was used to predict the subcellular  
17 localization of each protein (Yu *et al.*, 2010). Proteins for which signal peptides were not  
18 predicted were also checked for non-classical secretion using the SecretomeP online server  
19 (<http://www.cbs.dtu.dk/services/SecretomeP/>, Bendtsen *et al.*, 2005). Assignment of metabolic  
20 functions for each protein was done by sequence-based comparison using blastp  
21 (<http://www.ncbi.nlm.nih.gov/Blast/>) against the NCBI (nr) database and against the UniProt  
22 knowledgebase (<http://web.expasy.org/blast/>, UniProt-Consortium, 2015). For hypothetical  
23 proteins and proteins with inadequate annotation, their likely functions were deduced using  
24 hidden markov model-based searches, such as PFAM (<http://pfam.xfam.org/>, Finn *et al.*, 2014)  
25 and HHpred (<http://toolkit.tuebingen.mpg.de/hhpred>, Biegert *et al.*, 2006) and on the basis of  
26 their genomic context using RAST SEED viewer 2.0 (<http://rast.nmpdr.org/>, Aziz *et al.*, 2008;  
27 Overbeek *et al.*, 2014).

1 *Reconstruction of metabolic pathways*

2 The annotated proteins were sorted into groups according to their metabolic functions. Proteins  
3 from each group were then mapped manually into pathways using classical metabolic maps  
4 from databases such as Metacyc (Caspi *et al.*, 2014) and KEGG (Kanehisa *et al.*, 2014) as  
5 templates. In cases where not all proteins of a pathway were identified in the proteome, we  
6 checked for the corresponding genes of missing proteins in the respective genomes using  
7 RAST SEED viewer. All metabolic maps were redrawn using Inkscape version 0.48. Graphical  
8 representation of data was performed using GraphPad Prism version 5.00 for Windows,  
9 GraphPad Software, La Jolla California USA, [www.graphpad.com](http://www.graphpad.com)  
10 (<http://www.graphpad.com/scientific-software/prism/>).

11

12

## 1 **Supplementary Results and Discussion**

2 We identified a total of 3128 proteins from *B. azoricus* and its symbionts (Supplementary Table  
3 S2C). The draft genome assemblies of the *B. azoricus* thiotrophic symbiont yielded 717 protein  
4 identifications (~25% of all predicted ORFs, Supplementary Table S2C). An additional 183  
5 proteins were identified with genomes of thiotrophic symbionts of other *Bathymodiolus* species  
6 and phylogenetically related sulfur-oxidizing Gammaproteobacteria. For the methanotroph we  
7 identified 344 proteins (Supplementary Table S2C). The lower number of identified  
8 methanotroph proteins is probably due to (i) the fragmented state of the current genome  
9 assembly and (ii) the inherently lower numbers of methanotroph cells in *B. azoricus*. There is  
10 currently no genome sequence available for the host. Nevertheless, we could identify 1884  
11 proteins using sequences from a *B. azoricus* EST library and of other related bivalve molluscs  
12 (Supplementary Table S2C). Based on these protein identifications and their relative  
13 abundances (in NSAF %) we were able to draw a detailed picture of the metabolic network  
14 within the *B. azoricus* consortium, which is described in the main text and in the following  
15 sections.

### 16 *Energy metabolism in B. azoricus symbionts*

#### 17 *Enzymes involved in the oxidation of sulfur substrates in the thiotrophic B. azoricus symbiont:*

18 Energy generation through the oxidation of thiosulfate, which appears to play a prominent role  
19 in the thiotrophic *B. azoricus* symbiont (see main text), involves the periplasmic sulfur oxidation  
20 (Sox) multienzyme complex. As also proposed for other gammaproteobacterial sulfur-oxidizing  
21 symbionts (Harada *et al.*, 2009; Markert *et al.*, 2011; Kleiner *et al.*, 2012b), the *B. azoricus*  
22 thiotroph's Sox complex, which oxidizes thiosulfate to form sulfate, lacks a SoxCD homolog.  
23 Although a putative SoxD transcript of the *B. azoricus* thiotroph was identified in a gill  
24 transcriptome (Egas *et al.*, 2012), no SoxCD homolog was detected in the genome or proteome  
25 in this study. SoxCD is a sulfur dehydrogenase and in its absence, the sulfane sulfur bound to  
26 SoxY cannot be oxidized further and may instead be transferred to growing periplasmic sulfur

1 intermediates (Sauve *et al.*, 2007). Apart from that, all components of the Sox multienzyme  
2 complex, SoxXYZAB, were identified in the proteome (Supplementary Figure S2A,  
3 Supplementary Table S3). The thiotroph's SoxY (BazSymB\_scaffold00004\_21) and SoxB  
4 (BazSymA\_Acontig01323\_2) were amongst the most abundant proteins identified from  
5 membranes of gradient pellet and gill samples (Figure 3).

6 Unlike other sulfur oxidizers, the thiotrophic *B. azoricus* symbiont does not possess proteins  
7 for concentration and storage of sulfur ("sulfur globule proteins"), as confirmed by our study.  
8 However, orthorhombic precipitates of elemental sulfur have been found in the periplasm of  
9 the *B. azoricus* thiotroph (Pruski *et al.*, 2002), likely as intermediates of Sox-mediated  
10 thiosulfate oxidation and/or resulting from polysulfide formation by Sqr (see below and  
11 Supplementary Figure S2).

12 Oxidation of sulfide, although possibly less prominent in the thiotrophic *B. azoricus* symbiont,  
13 is initiated by the periplasmic oxidation of sulfide to polysulfides by the membrane-bound  
14 sulfur:quinone reductase (Sqr). We found three non-identical homologs of Sqr encoded in  
15 separate locations in the thiotroph's genome. All three homologs were detected in the  
16 proteome (Supplementary Table S3, BazSymA\_Acontig140454\_0,  
17 BazSymA\_V2Acontig295479\_0, BazSymA\_Acontig02297\_1). Whether these Sqr proteins  
18 differ in their function is unclear; however, simultaneous expression of multiple Sqr proteins  
19 may aid in efficient removal of sulfide, protecting the host from its toxicity (Shibata *et al.*, 2001).  
20 After initial periplasmic thiosulfate or sulfide oxidation, the next steps of sulfide oxidation to  
21 sulfate proceed in the cytoplasm through the rDSR-APS-Sat pathway of gammaproteobacterial  
22 sulfur-oxidizing symbionts (Markert *et al.*, 2011; Kleiner *et al.*, 2012a; Kleiner *et al.*, 2012b).  
23 Most components of the reverse dissimilatory sulfite reductase (rDSR) complexes (DsrAB,  
24 DsrC, DsrEH, DsrL, DsrKMO), the adenylylsulfate reductase (APS) complex (AprAB) and  
25 sulfate adenylyltransferase (Sat) were identified in the thiotrophic symbiont's proteome  
26 (Supplementary Figure S2A, Supplementary Table S3). Two sulfate transporters (SulP,  
27 BAZSYMA\_Acontig02997\_2, BAZSYMA\_Acontig01342\_0) are encoded in the genome, but

1 neither was detected in the proteome, likely due to their extensive membrane integration,  
2 which makes detection by proteomics difficult.

3 *Hydrogen oxidation appears to be less relevant in the B. azoricus thiotroph from Menez Gwen:*

4 In our study, the thiotrophic *B. azoricus* symbiont expressed the membrane-bound uptake  
5 hydrogenase HupL (BazSymB\_scaffold00037\_2), the key enzyme involved in hydrogen  
6 oxidation. An earlier study by Petersen and colleagues (2011a) reported hydrogen oxidation  
7 in the sulfide-oxidizing symbiont of *B. puteoserpentis* mussels from Logatchev vent (MAR),  
8 where energy from H<sub>2</sub> oxidation promoted carbon fixation at rates similar to sulfide oxidation.  
9 HupL abundance as determined in our study was lower than that of the sulfur oxidation-related  
10 enzymes, accounting for only a small fraction of the thiotroph's proteome (0.05 % OrgNSAF of  
11 the gradient pellet proteome and 0.1 % OrgNSAF of the gradient pellet membrane proteome).

12 This relatively low HupL expression likely reflects the relatively low *in situ* concentration of H<sub>2</sub>  
13 in the vent fluids surrounding *B. azoricus* at the sampling site (Menez Gwen). Previous studies  
14 showed that (i) H<sub>2</sub> concentration in end-member fluids of Menez Gwen is considerably lower  
15 (0.024/0.048 mmol/kg) compared to that from Logatchev (12 mmol/kg, Charlou *et al.*, 2002)  
16 and (ii) basalt-hosted vents, such as Menez Gwen, produce fluids comparatively rich in H<sub>2</sub>S  
17 but low in H<sub>2</sub> (Petersen *et al.*, 2011a; Zielinski *et al.*, 2011). Furthermore, the uptake rate of H<sub>2</sub>  
18 in *Bathymodiolus* mussels from Logatchev and southern MAR vent sites was shown to be  
19 influenced by the *in situ* concentrations of available H<sub>2</sub>, i.e. the lower the availability, the lower  
20 the uptake (Petersen *et al.* 2011). Thus, we propose that although the *B. azoricus* symbiosis  
21 uses hydrogen as an energy source, H<sub>2</sub> oxidation may not be as important as sulfur oxidation,  
22 under the conditions reflected in this study.

23 *Energy-generating methane and formaldehyde oxidation in the methanotroph - pathway*

24 *details:* The methanotrophic symbiont of *B. azoricus* generates electrons from oxidation of  
25 methane to formaldehyde in a two-step oxidation process: i) Methane is oxidized to methanol  
26 through the copper-containing particulate methane monooxygenase (pMMO) complex



1 (BAZMOX\_contig00686\_3, BAZMOX\_contig00686\_4, BAGiLS\_001099) located on its  
2 intracytoplasmic membranes (see main text and Supplementary Figures S2B and S3). ii)  
3 Methanol is further oxidized to formaldehyde through the periplasmic XoxF-type methanol  
4 dehydrogenase (BAZMOX\_contig18015\_2, Fiala-Médioni *et al.*, 2002). The resulting  
5 formaldehyde enters the cytoplasm, where it is channelled into carbon assimilation reactions  
6 (see below) or oxidized to CO<sub>2</sub> for energy generation with the aid of either one of two cofactors,  
7 tetrahydrofolate (H<sub>4</sub>F) or dephospho-tetrahydromethanopterin (H<sub>4</sub>MPT, Thauer, 1998; Maden,  
8 2000). While the initial step of formaldehyde condensation with H<sub>4</sub>F is spontaneous  
9 (Supplementary Figure S3), formaldehyde binding to H<sub>4</sub>MPT is mediated by the formaldehyde-  
10 activating enzyme Fae (Vorholt, 2002). Fae was abundantly expressed (2.5 % gill OrgNSAF,  
11 BAZMOX\_contig158934\_1) in the methanotroph's proteome (Supplementary Table S3). In the  
12 methylotrophic Alphaproteobacterium *Methylobacterium extorquens* high Fae levels allow for  
13 rapid detoxification of accumulating formaldehyde, and H<sub>4</sub>MPT-based formaldehyde oxidation  
14 was therefore suggested to be the preferred energy generation pathway, while the H<sub>4</sub>F  
15 pathway might be less relevant (Vorholt *et al.*, 2000; Vorholt, 2002). Considering the high Fae  
16 abundance detected in our study, the majority of the formaldehyde is likely to enter the H<sub>4</sub>MPT-  
17 linked energy-generating pathway in the *B. azoricus* methanotroph (Supplementary Figure  
18 S3). H<sub>4</sub>F-based formaldehyde oxidation might occur less frequently, i.e. in case of excess  
19 formaldehyde (as also observed by Crowther *et al.*, 2008). In several subsequent enzymatic  
20 conversions both the H<sub>4</sub>F-dependent pathway and the H<sub>4</sub>MPT pathway produce formate,  
21 which is finally oxidized to CO<sub>2</sub> by the enzyme formate dehydrogenase (Fdh) in an energy-  
22 generating reaction. 17-49 % of the consumed methane was observed to be transformed to  
23 CO<sub>2</sub> in *B. azoricus* and *B. puteoserpentis* (reviewed in Petersen and Dubilier, 2009). It is  
24 unclear from our data, however, whether formate is oxidized completely to CO<sub>2</sub>. The Fdh  
25 protein was not detected in the proteome in this study, and the respective gene was also  
26 missing from the *B. azoricus* methanotroph's genome. This may be attributed to the  
27 incompleteness of our genome assembly, as an Fdh-encoding gene is present in the  
28 *Bathymodiolus* sp. methanotroph genome assembly from South MAR (METH93\_3). It may be

1 speculated that if the methanotroph indeed generates CO<sub>2</sub>, as suggested by Petersen and  
2 Dubilier (2009), it could be redirected to the thiotroph for carbon fixation by the methanotrophic  
3 CA (BAZMOX\_contig02303\_3), forming an internal carbon cycling mechanism between the  
4 two endosymbionts.

#### 5 *Carbon metabolism in B. azoricus*

6 *The thiotroph uses a modified Calvin cycle for CO<sub>2</sub> fixation:* The thiotrophic symbiont of *B.*  
7 *azoricus* possesses a variant of the classical Calvin-Benson-Bassham (CBB) cycle (Figure  
8 4A), where a reversible pyrophosphate-dependent phosphofructokinase, PP<sub>i</sub>-PFK (PfkA,  
9 BazSymB\_scaffold00001\_50) replaces the function of two missing enzymes: fructose-1,6-  
10 bisphosphatase and sedoheptulose-1,7-bisphosphatase (Kleiner *et al.*, 2012a). In some sulfur-  
11 oxidizing symbionts, a pyrophosphate-energized proton pump (H<sup>+</sup>PPA) is co-transcribed with  
12 PP<sub>i</sub>-PFK. PP<sub>i</sub> produced by the PP<sub>i</sub>-PFK working in reverse in the Calvin cycle can be used by  
13 H<sup>+</sup>PPA to generate a proton motive force, thus making the CBB cycle more energy-efficient  
14 (Markert *et al.*, 2011; Kleiner *et al.*, 2012b). H<sup>+</sup>PPA, however, was not found in the genome or  
15 the proteome of the *B. azoricus* thiotroph, indicating that the modified Calvin cycle may not be  
16 particularly energy-efficient in this symbiont. Whether the PP<sub>i</sub>-PFK offers other yet unknown  
17 selective advantages to the symbiont still remains an open question.

18 *The methanotroph's RuMP pathway may not be complete:* From our data it is unclear whether  
19 the methanotroph's RuMP pathway is capable of completely oxidizing formaldehyde to  
20 pyruvate and acetyl-CoA, as the enzyme phosphoglycerate mutase was not identified in the  
21 methanotroph's genome. However, theoretically, the *B. azoricus* methanotroph could also  
22 adopt an alternative route for this using the Entner-Doudoroff pathway (Figure 4B). This  
23 pathway requires two enzymes, phosphogluconate dehydratase (Edd) and phospho-2-keto-3-  
24 deoxygluconate (KDPG) aldolase of which the former was identified in the proteome  
25 (METH418\_1, 0.007 % gill OrgNSAF).

1 *The methanotroph may also use the serine pathway for carbon assimilation:* Generally,  
2 methanotrophs assimilate carbon via the RuMP pathway (classified as type I methanotrophs),  
3 or via an alternate route, the serine pathway (type II methanotrophs), while a few others use  
4 the RuMP as major route while additionally possessing elements of the serine pathway (type  
5 X, Hanson and Hanson, 1996; Ward *et al.*, 2004; Chistoserdova and Lidstrom, 2013). In this  
6 study, we identified a few key enzymes of the serine pathway, such as a serine-glyoxylate  
7 aminotransferase (SgaA, METH759\_0; identified from the sequence of the methanotrophic  
8 symbiont of *Bathymodiolus sp.* from a southern MAR vent), and a malyl-CoA lyase (MclA,  
9 BAZMOX\_contig18662\_0, Supplementary Figure S3). A homolog of malate thiokinase (MtkA,  
10 generating malyl-CoA and phosphoenol carboxylase) was not detected in our study but is  
11 encoded in the genome of the methanotrophic *B. azoricus* symbiont from Lucky Strike vent (L.  
12 Sayavedra, unpublished data) and may thus be present in the *B. azoricus* methanotroph after  
13 all. However, for the pathway to close, consumed glyoxylate needs to be regenerated  
14 (Anthony, 1982). Candidate enzymes such as isocitrate lyase and those of the glyoxylate-  
15 regeneration cycle, which can putatively perform this function (Korotkova *et al.*, 2002), are  
16 absent in the *B. azoricus* methanotroph. Hence, the serine pathway seems to be only partially  
17 active, as also described for *Methylococcus capsulatus* (Ward *et al.*, 2004), and cannot operate  
18 as a major pathway for formaldehyde assimilation in the methanotroph. The incompleteness  
19 of the methanotrophic symbiont's genome assembly and the possibility that these enzymes  
20 are expressed at *in situ* levels too low to be identified through our approach hinders our  
21 understanding of the exact function of this pathway in *B. azoricus*. However, it has been  
22 suggested that the expression of some basic enzymes of the serine pathway may serve two  
23 functions: Firstly, when formaldehyde is in excess, tetrahydrofolate and  
24 tetrahydromethanopterin (see methane oxidation section) can channel carbon into the serine  
25 pathway, thus preventing accumulation of the toxic formaldehyde. Secondly, the intermediates  
26 of the serine cycle could function as precursors for cellular biosynthesis (Chistoserdova *et al.*,  
27 2005).

28

1 *The methanotrophic symbiont may be able to live on multicarbon substrates:* The genome of  
2 the methanotrophic *B. azoricus* symbiont encodes TRAP transporters for dicarboxylates  
3 (BAZMOX\_contig03539\_1, BAZMOX\_contig03539\_2) and also a phosphoenolpyruvate-  
4 dihydroxyacetone phosphotransferase system for transport of dihydroxyacetone and fructose  
5 (BAZMOX\_contig03539\_0, METH02\_0, METH531561754). The methanotroph could thus in  
6 principle take up organic substrates in the absence of methane and catabolize them, given  
7 that a complete TCA cycle is expressed under these conditions (as proposed in the main text).  
8 While methane is usually abundantly available to the methanotrophic symbiont of *B. azoricus*,  
9 rendering a complete TCA cycle unnecessary, hydrothermal vent resources fluctuate and a  
10 temporary scarcity of methane is conceivable. During these periods, the methanotrophic  
11 symbiont may potentially import multicarbon substrates or break down glycogen (Figure 4B;  
12 see below). Moreover, a complete TCA cycle and thus the ability to survive on alternative  
13 organic substrates may also be advantageous for a potential free-living stage of the  
14 methanotroph's life cycle, during which steady access to methane may not be possible.

15 *B. azoricus and its methanotrophic symbiont synthesize storage compounds:* The  
16 methanotrophic symbiont of *B. azoricus* expressed enzymes of the glycogen synthesis  
17 pathway such as glycogen synthase (GlgA, BAZMOX\_contig07384\_1) and glucose-1-  
18 phosphate adenylyltransferase (GlgC, YP\_004918751.1, Figure 4B). The alpha-glucan  
19 branching enzyme, involved in inserting branch points in the glycogen chain, however, was not  
20 detected, although it is encoded in the methanotroph's genome (GlgB,  
21 BAZMOX\_contig07384\_2). The methanotroph is known to synthesize polysaccharides such  
22 as glycogen when there is an excess of formaldehyde (Linton and Cripps, 1978; Pieja *et al.*,  
23 2011a; Pieja *et al.*, 2011b), thereby storing carbon for periods of low nutrient availability. In  
24 contrast, the thiotrophic symbiont does not seem to possess the genetic machinery for the  
25 biosynthesis of storage compounds, such as glycogen. A eukaryotic glycogen synthase (GlgA)  
26 was identified in the proteome with a sequence of a bivalve relative of *B. azoricus*  
27 (AAS93900.1). Interestingly, this host protein was only expressed in the gill (Supplementary

1 Table S3) and not in the foot, indicating enhanced glycogen storage activity in the symbiont-  
2 containing tissue, possibly based on symbiont digestion-related release of carbon compounds.  
3 Glycogen-like storage compounds have also been detected in the adipogranular cells of  
4 mantle connective tissue in *B. azoricus* (Lobo-da-Cunha *et al.*, 2006), suggesting that glycogen  
5 can also be a regular carbon reserve in non-symbiont-containing tissues.

#### 6 *Nitrogen metabolism in the B. azoricus symbiosis*

7 *Ammonium and nitrate are nitrogen sources for the symbiosis:* Previous reports detected  
8 ammonia and nitrate in the range of 8-10  $\mu\text{mol l}^{-1}$  and 0-2  $\mu\text{mol l}^{-1}$ , respectively, in end-member  
9 fluids of the MAR Menez Gwen vent field (Sarradin *et al.*, 1999). Our metaproteome analysis  
10 suggests that both the *B. azoricus* host and its symbionts assimilate nitrogen from ammonia  
11 into their amino acids using the ammonia-assimilating enzymes glutamine synthetase, GlnA,  
12 (BAGiLS\_000948, BazSymA\_Acontig00191\_2, METH59\_2) and glutamate synthase, GltBD  
13 (BazSymA\_Acontig00571\_2, BazSymB\_scaffold00012\_17, BAZMOX\_contig02646\_0,  
14 Supplementary Table S3, Supplementary Figures S4 and S5).

15 The thiotrophic symbiont, already shown to possess genes for the assimilatory reduction of  
16 nitrate (Kleiner *et al.*, 2012a), also expressed an assimilatory nitrate reductase (NasA,  
17 BazSymA\_Acontig00081\_3) and a nitrite reductase (NirB, BazSymA\_Acontig00081\_0) in its  
18 proteome. So far, nothing was known about the nitrate assimilation capabilities of the  
19 methanotrophic *B. azoricus* symbiont. A study reported the absence of nitrate utilization in an  
20 undescribed *Bathymodiolus* sp. found at hydrocarbon seeps of the Gulf of Mexico, which  
21 exclusively contains a methanotrophic symbiont (Lee and Childress, 1994). In our study, we  
22 did identify a methanotrophic NirB (BAZMOX\_contig06966\_3) but a homolog for NasA could  
23 not be found in the methanotroph's genome or proteome (Supplementary Table S3). Since the  
24 *nasA* gene is present in other related free-living methane oxidizers (Murrell and Dalton, 1983),  
25 we speculate that the *B. azoricus* methanotroph may possess a complete nitrate assimilation  
26 pathway, which was simply not identified in our study due to limited genome information.

1 *The thiotroph can use nitrate as an electron acceptor.* Several enzymes involved in respiratory  
2 nitrate reduction (i.e. denitrification), such as the membrane-bound respiratory nitrate  
3 reductase subunit NarG (BazSymA\_Acontig00119\_5), a copper-containing periplasmic nitrite  
4 reductase (NirK, BazSymB\_scaffold00114\_1) and a quinol nitric oxide reductase subunit  
5 (NorB, BazSymA\_Acontig03118\_2) were identified in the thiotroph's proteome  
6 (Supplementary Figure S5, Supplementary Table S3), indicating use of nitrate as a terminal  
7 electron acceptor. Whether the symbiont can perform complete reduction of nitrate remains  
8 unclear, since a gene for nitrous oxide reductase, NosZ, catalyzing the final step of nitrate  
9 reduction to dinitrogen gas, was not detected in the genome or the proteome (Supplementary  
10 Figure S4). A bacterial transcript of *nosZ* was reported in the gill transcriptome of *B. azoricus*  
11 (Egas *et al.*, 2012). Nevertheless, even if NosZ were absent, our results show that the thiotroph  
12 can respire nitrate to nitrous oxide. Although genes for dissimilatory nitrate reduction were not  
13 detected in the methanotrophic *B. azoricus* symbiont's genome in our analysis, a NarG  
14 homolog (ZP\_08782554.1) was identified in the gill fraction using the sequence of the related  
15 free-living methanotroph *Methylobacter tundripaludum* SV96, indicating that the genetic  
16 machinery for nitrate respiration may be present in the methanotroph (Supplementary Table  
17 S3). Nitrate can act as an electron acceptor during anoxic conditions in free-living and  
18 symbiotic bacteria from the deep-sea (Hentschel and Felbeck, 1993; Girguis *et al.*, 2000;  
19 Vetriani *et al.*, 2014). However, *in situ* levels of oxygen in the seawater were around 107  $\mu\text{M}$   
20 during mussel collection, which is high enough to support aerobic respiration in marine  
21 bacteria. We identified homologs of terminal cytochrome oxidases for oxygen respiration in our  
22 thiotroph proteome (Supplementary Table S3). This indicates that under oxygenated  
23 conditions nitrogen respiration enzymes might be constitutively expressed in the thiotrophic  
24 symbiont. This constitutive expression was also reported for the *Lucinoma aequizonata*  
25 symbiont (Hentschel *et al.*, 1996) and the  $\gamma$ 3-symbiont of *O. algarvensis* (Kleiner *et al.*, 2012b).  
26 In the *B. azoricus* thiotroph, the use of nitrate as an oxidant would not only reduce competition  
27 between host and symbiont for oxygen but may also enable it to overcome anoxic periods  
28 occurring in its natural environment.

1 *Alternative routes to replenish oxaloacetate and succinate are missing in the thiotroph*

2 The thiotrophic symbiont's genome does not encode the enzymes Mdh and Sdh, which are  
3 required for the replenishment of the essential TCA intermediates oxaloacetate and succinate  
4 (see main text, Figures 4A and 5A). A functional substitute for the malate dehydrogenase Mdh,  
5 for instance the irreversible membrane-bound malate:quinone oxidoreductase (Mqo) found in  
6 the obligate deep-sea autotroph *Thiomicrospira crunogena* XCL-2 (Scott *et al.*, 2006), could in  
7 principle allow regeneration of oxaloacetate, but no such alternates were found in the  
8 thiotrophic *B. azoricus* symbiont's genome (Figure 5B). Theoretically, oxaloacetate could also  
9 be derived from aspartate through the aspartate transaminase AspC expressed in the thiotroph  
10 (BazSymA\_Acontig06653\_0), provided that cellular aspartate levels are sufficient to drive this  
11 enzyme in reverse (Figure 5A and B, Supplementary Table S3). However, as indicated by our  
12 data, the thiotroph consumes aspartate for the biosynthesis of lysine, threonine and methionine  
13 at relatively high rates (see main text), which makes aspartate an unlikely source for  
14 oxaloacetate regeneration. Enzymes that could functionally replace Sdh or alternate routes for  
15 the replenishment of succinate and succinyl-CoA were also missing in the thiotrophic  
16 symbiont's genome (Figure 5B). The need for succinyl-CoA for porphyrin biosynthesis might  
17 theoretically be circumvented as porphyrin can also be synthesized from glutamate (Scott *et*  
18 *al.*, 2006) and the respective enzymes were expressed by the thiotroph (see Supplementary  
19 Figure S5, proto- and siroheme cofactors). However, succinyl-CoA is also involved in lysine  
20 and methionine biosynthesis (as is oxaloacetate) and its replenishment therefore mandatory.  
21 The thiotrophic symbiont may thus not be able to restore its oxaloacetate and succinate stocks  
22 autonomously. Instead, it might rely on an external supply of oxaloacetate and succinate or  
23 precursors of these compounds from either of its symbiotic partners. The methanotrophic  
24 symbiont encodes both Mdh and PckA and may thus theoretically be capable of providing  
25 oxaloacetate to the thiotroph (PckA was identified in the proteome: BAZMOX\_contig10981\_0;  
26 see Figure 4B). However, owing to the incomplete genome information we do not know if the  
27 methanotroph also has the potential to export oxaloacetate or C4 intermediates from its

1 cytoplasm into the bacteriocyte cytosol. It is therefore questionable whether the methanotroph  
2 might be involved in replenishing oxalaoacetate or succinate to the thiotroph. Our results do,  
3 however, indicate that the host likely supplies oxaloacetate and succinate to the thiotrophic  
4 symbiont (see main text).

5 *Potential causes of high expression of chaperones and bacterial nucleoid proteins in B.*  
6 *azoricus symbionts*

7 The chaperones GroEL (BazSymB\_scaffold00015\_18, BAZMOX\_contig109183\_0,  
8 BAZMOX\_contig53815\_0, METH500\_1), GroES (BazSymB\_scaffold00015\_17,  
9 BAZMOX\_contig53815\_1), DnaJ (BazSymA\_Acontig00623\_1) and DnaK  
10 (BazSymB\_scaffold00038\_12, BAZMOX\_contig04778\_1, BAZMOX\_contig243452\_0) were  
11 extraordinarily abundant in both *B. azoricus* symbionts, as were the thiotroph's DNA-binding  
12 protein Hns (BAT01474) and HU beta (HupB, BazSymB\_scaffold00007\_16, see main text and  
13 Supplementary Table S3). On a molecular level, both chaperones and DNA-binding proteins  
14 (also called histone chaperones) share parallel roles: Chaperones facilitate folding and  
15 transport of newly synthesized proteins and the disaggregation or repair of damaged proteins.  
16 DNA-binding proteins act at the level of DNA, mediating the degree of DNA compaction (Spurio  
17 *et al.*, 1992; Köhler and Marahiel, 1997). Both protein classes are generally abundant in most  
18 bacteria, e.g. in *E. coli* and *B. subtilis*, where GroEL and HupB/Hns are among the top 5 % of  
19 most abundant proteins (Chi *et al.*, 2011; Mancuso *et al.*, 2012). Their expression is  
20 upregulated in response to a variety of stress conditions that endanger DNA and protein  
21 integrity, such as thermal stress, radioactivity, oxidative stress and osmotic stress (Farr and  
22 Kogoma, 1991; Atlung and Ingmer, 1997; Esser *et al.*, 1999; Prasad *et al.*, 2003; Ghosh and  
23 Grove, 2006; Lieber *et al.*, 2009; Nguyen *et al.*, 2009; Wang and Maier, 2015).

24 In our study, thermal stress is not a likely cause of protein or DNA damage in *B. azoricus*  
25 symbionts, as the measured temperature during time of collection was 9 °C, which  
26 corresponds to normal habitat conditions (Pruski and Dixon, 2003). Although other common



1 stress factors in hydrothermal vent environments, such as radioactivity (Cherry *et al.*, 1992),  
2 heavy metals (Rousse *et al.*, 1998) and free radical generation by spontaneous reactions of  
3 H<sub>2</sub>S with oxygen (Tapley, 1999) cannot be excluded, it is also conceivable that high levels of  
4 chaperones and DNA-binding proteins in the *B. azoricus* symbionts might not necessarily be  
5 related to stress response, but rather have a symbiosis-specific role. This would be in  
6 agreement with the observation that symbionts of invertebrates inhabiting shallow water, such  
7 as *O. algarvensis* and *Codakia orbicularis*, where the above mentioned factors are absent,  
8 also show particularly high expression levels of chaperones and DNA-binding proteins (Kleiner  
9 *et al.*, 2012b; T. Schweder, personal communication).

10 Chaperones and DNA-binding proteins may be of particular relevance in some symbioses,  
11 because they were hypothesized to buffer the symbiont genomes against deleterious  
12 mutations that accumulate during vertical transmission. Due to population bottlenecks,  
13 vertically transmitted symbionts, such as the aphid symbiont *Buchnera aphidicola*, experience  
14 an increased rate of evolution as compared to their free-living counterparts, and therefore carry  
15 a high mutational load in their greatly reduced genomes (Itoh *et al.*, 2002). Overexpression of  
16 chaperones in these symbionts salvages misfolded proteins arising from DNA mutations  
17 (Fares *et al.*, 2002; Maisnier-Patin *et al.*, 2005). *B. aphidicola*, for example, constitutively  
18 overexpresses GroEL, which makes up 10% of the total cellular protein under optimum  
19 conditions (Baumann *et al.*, 1996). There are indications that DNA-binding proteins may  
20 protect against deleterious mutations at the DNA level (Warnecke *et al.*, 2012), although these  
21 effects have not yet been investigated in symbionts. If, like in the insect symbioses, the  
22 overexpression of chaperones and DNA-binding proteins in *B. azoricus* symbionts is a  
23 response to the accumulation of deleterious mutations, this might mean that the *B. azoricus*  
24 symbionts, too, experience an increased rate of evolution. Although the specific conditions that  
25 lead to high mutational rates in *Buchnera*, such as sexual isolation and population bottle necks  
26 during transmission, do likely not apply to the *B. azoricus* thiotroph, the process of adapting to  
27 its intracellular niche might still be accompanied by an increased number of mutation events.

1 Another possible explanation for elevated levels of chaperones and DNA-binding proteins  
2 would be that the symbionts face symbiosis-specific intracellular challenges, such as host-  
3 mediated immune responses or digestion. Pathogenic bacteria induce an elaborate heat shock  
4 response to override unfavorable conditions caused by the host immune reaction (Neckers  
5 and Tatu, 2008). While the thiotrophic symbiont of *B. azoricus* is not related to any known  
6 pathogen (Sayavedra *et al.*, 2015) it might use a similar strategy to survive in the intracellular  
7 environment. The exact nature of this hypothetical 'host stress' remains to be elucidated.

#### 8 *Symbiont proteins involved in immunity to phages*

9 *B. azoricus* symbionts encode two well-known forms of bacterial defense against  
10 bacteriophages (Labrie *et al.*, 2010). The thiotroph's genome encodes four CRISPR-  
11 associated (Cas) proteins, multiple CRISPR repeats and spacers, and 40 restriction-  
12 modification (R-M) associated proteins, while the methanotroph's genome encodes 24 R-M  
13 proteins (Supplementary Table S5). This is surprising, because in their intracellular niches  
14 endosymbionts are expected to rarely experience exposure to phages (Vasu and Nagaraja,  
15 2013). We detected some of the CRISPR-Cas and R-M proteins in whole gill samples and  
16 symbiont enrichments, suggesting that the symbionts actively express phage defense  
17 mechanisms while residing within bacteriocytes, although at relatively low abundances  
18 (Supplementary Tables S3 and S5A). Cas proteins were observed in very high concentrations,  
19 i.e. constituting 90 % of total spectral counts in phage-infected *Streptococcus thermophilus*,  
20 while their expression is constitutively low in the absence of phages (Agari *et al.*, 2010; Young  
21 *et al.*, 2012). Low abundance of Cas and R-M proteins in the *B. azoricus* symbionts therefore  
22 likely reflects constitutively low expression rather than a response to recent phage invasion.  
23 Moreover, the thiotroph's Cas genes are spread out over the genome rather than being  
24 encoded in a common locus adjacent to CRISPR repeats, indicating that functionality against  
25 viral encounters might be restricted (van der Oost *et al.*, 2009). The free-living relatives of the  
26 *B. azoricus* thiotroph, SUP05 and Arctic96BD-19, do not encode CRISPR loci in their

1 genomes, and only a single R-M-associated gene was found in the SUP05 genome (Walsh *et*  
2 *al.*, 2009; Swan *et al.*, 2011). The Arctic96BD-19 genomes did not encode any R-M genes.  
3 Finally, the best BLAST hits to the thiotroph's Cas and R-M genes were from methylotrophic  
4 Gammaproteobacteria, pathogenic *Acinetobacter* spp. and other distantly related bacterial  
5 taxa and archaea, raising the possibility that these genes were acquired by horizontal gene  
6 transfer. The unexpected presence of phage defense mechanisms in *B. azoricus* symbionts  
7 despite their intracellular niches may thus point to other symbiosis-related roles for CRISPR-  
8 Cas and R-M proteins, besides cellular defense. Cas proteins have, for instance, been  
9 suggested to help pathogenic bacteria to evade the host's innate immunity during infection  
10 (Sampson and Weiss, 2013). A similar function could be hypothesized in the *B. azoricus*  
11 symbionts.

#### 12 *Host proteins with immune- or defense-related functions*

13 A set of 23 immune-related host proteins was detected in our study. Seven of them showed  
14 significantly elevated expression levels in gills and supernatant as compared to symbiont-free  
15 foot tissue samples, or were not detected in foot tissue at all, indicating a symbiosis-specific  
16 function (Table 1). These host proteins included a lectin, a coagulation factor domain protein,  
17 and a cytolysin. The cytolysin was 5.57 times more abundant in the symbiont-enriched gradient  
18 pellet than in whole gill tissue, indicating that it might be involved in direct interaction with the  
19 bacterial cells (causing it to be pulled down in the gradient pellet). The presence of an active  
20 innate immune system targeting pathogens in the hemolymph of *B. azoricus* is known  
21 (Bettencourt *et al.*, 2007; Bettencourt *et al.*, 2009; Martins *et al.*, 2014), but its potential role in  
22 interactions with the beneficial symbionts has not yet been addressed. Moreover, the exact  
23 functions of innate immunity proteins in symbiotic invertebrates are poorly understood.  
24 However, considering their physical association with the symbiont cells, these host proteins  
25 might play a role in mediating beneficial host-microbe interactions such as recognition and  
26 attachment (Bosch, 2013), rather than in defense against pathogens.

## References

- Agari Y, Sakamoto K, Tamakoshi M, Oshima T, Kuramitsu S, Shinkai A. (2010). Transcription profile of *Thermus thermophilus* CRISPR systems after phage infection. *J Mol Biol* **395**: 270-281.
- Anthony C. (1982). *The biochemistry of methylootrophs*. Academic Press: London; New York.
- Atlung T, Ingmer H. (1997). H-NS: a modulator of environmentally regulated gene expression. *Molecular microbiology* **24**: 7-17.
- Aziz RK, Bartels D, Best AA, DeJongh M, Disz T, Edwards RA *et al.* (2008). The RAST Server: rapid annotations using subsystems technology. *BMC Genomics* **9**: 75.
- Baumann P, Baumann L, Clark MA. (1996). Levels of *Buchnera aphidicola* Chaperonin GroEL During Growth of the Aphid *Schizaphis graminum*. *Curr Microbiol* **32**: 279-285.
- Bendtsen JD, Kiemer L, Fausboll A, Brunak S. (2005). Non-classical protein secretion in bacteria. *BMC Microbiol* **5**: 58.
- Bettencourt R, Roch P, Stefanni S, Rosa D, Colaco A, Santos RS. (2007). Deep sea immunity: unveiling immune constituents from the hydrothermal vent mussel *Bathymodiolus azoricus*. *Mar Environ Res* **64**: 108-127.
- Bettencourt R, Dando P, Collins P, Costa V, Allam B, Serrao Santos R. (2009). Innate immunity in the deep sea hydrothermal vent mussel *Bathymodiolus azoricus*. *Comp Biochem Physiol A Mol Integr Physiol* **152**: 278-289.
- Bettencourt R, Pinheiro M, Egas C, Gomes P, Afonso M, Shank T *et al.* (2010). High-throughput sequencing and analysis of the gill tissue transcriptome from the deep-sea hydrothermal vent mussel *Bathymodiolus azoricus*. *BMC Genomics* **11**: 559.
- Biegert A, Mayer C, Remmert M, Soding J, Lupas AN. (2006). The MPI Bioinformatics Toolkit for protein sequence analysis. *Nucleic Acids Res* **34**: W335-339.
- Bosch TC. (2013). Cnidarian-microbe interactions and the origin of innate immunity in metazoans. *Annu Rev Microbiol* **67**: 499-518.
- Bradford MM. (1976). A rapid and sensitive method for the quantitation of microgram quantities of protein utilizing the principle of protein-dye binding. *Anal Biochem* **72**: 248-254.
- Caspi R, Altman T, Billington R, Dreher K, Foerster H, Fulcher CA *et al.* (2014). The MetaCyc database of metabolic pathways and enzymes and the BioCyc collection of Pathway/Genome Databases. *Nucleic Acids Res* **42**: D459-471.
- Chambers MC, Maclean B, Burke R, Amodei D, Ruderman DL, Neumann S *et al.* (2012). A cross-platform toolkit for mass spectrometry and proteomics. *Nat Biotechnol* **30**: 918-920.
- Charlou JL, Donval JP, Fouquet Y, Jean-Baptiste P, Holm N. (2002). Geochemistry of high H<sub>2</sub> and CH<sub>4</sub> vent fluids issuing from ultramafic rocks at the Rainbow hydrothermal field (36 degrees 14 ' N, MAR). *Chem Geol* **191**: 345-359.
- Cherry R, Desbruyeres D, Heyraud M, Nolan C. (1992). High levels of natural radioactivity in hydrothermal vent polychaetes. *C R Acad Sci III* **315**: 21-26.

1  
2 Chi BK, Gronau K, Mäder U, Hessling B, Becher D, Antelmann H. (2011). S-Bacillithiolation  
3 Protects Against Hypochlorite Stress in *Bacillus subtilis* as Revealed by Transcriptomics and  
4 Redox Proteomics. *Mol Cell Proteomics* **10**: M111.009506.

5  
6 Chistoserdova L, Vorholt JA, Lidstrom ME. (2005). A genomic view of methane oxidation by  
7 aerobic bacteria and anaerobic archaea. *Genome Biol* **6**: 208.

8  
9 Chistoserdova L, Lidstrom M (2013). Aerobic Methylophilic Prokaryotes. In: Rosenberg E,  
10 DeLong E, Lory S, Stackebrandt E, Thompson F (eds). *The Prokaryotes*. Springer Berlin  
11 Heidelberg. pp 267-285.

12  
13 Crowther GJ, Kosaly G, Lidstrom ME. (2008). Formate as the main branch point for  
14 methylophilic metabolism in *Methylobacterium extorquens* AM1. *J Bacteriol* **190**: 5057-5062.

15  
16 Duperron S, Bergin C, Zielinski F, Blazejak A, Pernthaler A, McKiness ZP *et al.* (2006). A dual  
17 symbiosis shared by two mussel species, *Bathymodiolus azoricus* and *Bathymodiolus*  
18 *puteoserpentis* (Bivalvia: Mytilidae), from hydrothermal vents along the northern Mid-Atlantic  
19 Ridge. *Environ Microbiol* **8**: 1441-1447.

20  
21 Egas C, Pinheiro M, Gomes P, Barroso C, Bettencourt R. (2012). The transcriptome of  
22 *Bathymodiolus azoricus* gill reveals expression of genes from endosymbionts and free-living  
23 deep-sea bacteria. *Mar Drugs* **10**: 1765-1783.

24  
25 Esser D, Rudolph R, Jaenicke R, Böhm G. (1999). The HU protein from *Thermotoga maritima*:  
26 recombinant expression, purification and physicochemical characterization of an extremely  
27 hyperthermophilic DNA-binding protein. *J Mol Biol* **291**: 1135-1146.

28  
29 Eymann C, Dreisbach A, Albrecht D, Bernhardt J, Becher D, Gentner S *et al.* (2004). A  
30 comprehensive proteome map of growing *Bacillus subtilis* cells. *Proteomics* **4**: 2849-2876.

31  
32 Fares MA, Ruiz-Gonzalez MX, Moya A, Elena SF, Barrio E. (2002). Endosymbiotic bacteria:  
33 GroEL buffers against deleterious mutations. *Nature* **417**: 398.

34  
35 Farr SB, Kogoma T. (1991). Oxidative stress responses in *Escherichia coli* and *Salmonella*  
36 *typhimurium*. *Microbiol Rev* **55**: 561-585.

37  
38 Fiala-Médioni A, McKiness ZP, Dando P, Boulegue J, Mariotti A, Alayse-Danet AM *et al.*  
39 (2002). Ultrastructural, biochemical, and immunological characterization of two populations of  
40 the mytilid mussel *Bathymodiolus azoricus* from the Mid-Atlantic Ridge: evidence for a dual  
41 symbiosis. *Mar Biol* **141**: 1035–1043.

42  
43 Finn RD, Bateman A, Clements J, Coggill P, Eberhardt RY, Eddy SR *et al.* (2014). Pfam: the  
44 protein families database. *Nucleic Acids Res* **42**: D222-230.

45  
46 Florens L, Carozza MJ, Swanson SK, Fournier M, Coleman MK, Workman JL *et al.* (2006).  
47 Analyzing chromatin remodeling complexes using shotgun proteomics and normalized  
48 spectral abundance factors. *Methods* **40**: 303-311.

49  
50 Ghosh S, Grove A. (2006). The *Deinococcus radiodurans*-encoded HU protein has two DNA-  
51 binding domains. *Biochemistry* **45**: 1723-1733.

52  
53 Girguis PR, Lee RW, Desaulniers N, Childress JJ, Pospesel M, Felbeck H *et al.* (2000). Fate  
54 of nitrate acquired by the tubeworm *Riftia pachyptila*. *Appl Environ Microbiol* **66**: 2783-2790.

55

- 1 Hanson RS, Hanson TE. (1996). Methanotrophic bacteria. *Microbiol Rev* **60**: 439-471.
- 2
- 3 Harada M, Yoshida T, Kuwahara H, Shimamura S, Takaki Y, Kato C *et al.* (2009). Expression  
4 of genes for sulfur oxidation in the intracellular chemoautotrophic symbiont of the deep-sea  
5 bivalve *Calyptogena okutanii*. *Extremophiles* **13**: 895-903.
- 6
- 7 Hentschel U, Felbeck H. (1993). Nitrate Respiration in the Hydrothermal Vent Tubeworm *Riftia*  
8 *pachyptila*. *Nature* **366**: 338-340.
- 9
- 10 Hentschel U, Hand S, Felbeck H. (1996). The contribution of nitrate respiration to the energy  
11 budget of the symbiont-containing clam *Lucinoma aequizonata*: a calorimetric study. *J Exp Biol*  
12 **199**: 427-433.
- 13
- 14 Itoh T, Martin W, Nei M. (2002). Acceleration of genomic evolution caused by enhanced  
15 mutation rate in endocellular symbionts. *Proc Natl Acad Sci USA* **99**: 12944-12948.
- 16
- 17 Käll L, Storey JD, MacCoss MJ, Noble WS. (2008). Assigning significance to peptides identified  
18 by tandem mass spectrometry using decoy databases. *J Proteome Res* **7**: 29-34.
- 19
- 20 Kanehisa M, Goto S, Sato Y, Kawashima M, Furumichi M, Tanabe M. (2014). Data,  
21 information, knowledge and principle: back to metabolism in KEGG. *Nucleic Acids Res* **42**:  
22 D199-205.
- 23
- 24 Keller A, Nesvizhskii AI, Kolker E, Aebersold R. (2002). Empirical statistical model to estimate  
25 the accuracy of peptide identifications made by MS/MS and database search. *Anal Chem* **74**:  
26 5383-5392.
- 27
- 28 Kleiner M, Petersen JM, Dubilier N. (2012a). Convergent and divergent evolution of  
29 metabolism in sulfur-oxidizing symbionts and the role of horizontal gene transfer. *Curr Opin*  
30 *Microbiol* **15**: 621-631.
- 31
- 32 Kleiner M, Wentrup C, Lott C, Teeling H, Wetzel S, Young J *et al.* (2012b). Metaproteomics of  
33 a gutless marine worm and its symbiotic microbial community reveal unusual pathways for  
34 carbon and energy use. *Proc Natl Acad Sci USA* **109**: E1173-1182.
- 35
- 36 Köhler P, Marahiel MA. (1997). Association of the histone-like protein HBSu with the nucleoid  
37 of *Bacillus subtilis*. *J Bacteriol* **179**: 2060-2064.
- 38
- 39 Korotkova N, Chistoserdova L, Kuksa V, Lidstrom ME. (2002). Glyoxylate regeneration  
40 pathway in the methylotroph *Methylobacterium extorquens* AM1. *J Bacteriol* **184**: 1750-1758.
- 41
- 42 Labrie SJ, Samson JE, Moineau S. (2010). Bacteriophage resistance mechanisms. *Nat Rev*  
43 *Microbiol* **8**: 317-327.
- 44
- 45 Lee RW, Childress JJ. (1994). Assimilation of inorganic nitrogen by marine invertebrates and  
46 their chemoautotrophic and methanotrophic symbionts. *Appl Environ Microbiol* **60**: 1852-1858.
- 47
- 48 Li W, Jaroszewski L, Godzik A. (2001). Clustering of highly homologous sequences to reduce  
49 the size of large protein databases. *Bioinformatics* **17**: 282-283.
- 50
- 51 Lieber A, Leis A, Kushmaro A, Minsky A, Medalia O. (2009). Chromatin organization and radio  
52 resistance in the bacterium *Gemmata obscuriglobus*. *J Bacteriol* **191**: 1439-1445.
- 53

- 1 Linton JD, Cripps RE. (1978). The occurrence and identification of intracellular polyglucose  
2 storage granules in *Methylococcus* NCIB 11083 grown in chemostat culture on methane. *Arch*  
3 *Microbiol* **117**: 41-48.  
4
- 5 Lobo-da-Cunha A, Kádár E, Serrão Santos R. (2006). Histochemical and ultrastructural  
6 characterisation of mantle storage cells in the hydrothermal-vent bivalve *Bathymodiolus*  
7 *azoricus*. *Mar Biol* **150**: 253-260.  
8
- 9 Maden BE. (2000). Tetrahydrofolate and tetrahydromethanopterin compared: functionally  
10 distinct carriers in C-1 metabolism. *Biochem J* **350**: 609-629.  
11
- 12 Maisnier-Patin S, Roth JR, Fredriksson A, Nystrom T, Berg OG, Andersson DI. (2005).  
13 Genomic buffering mitigates the effects of deleterious mutations in bacteria. *Nature Genet* **37**:  
14 1376-1379.  
15
- 16 Mancuso F, Bunkenborg J, Wierer M, Molina H. (2012). Data extraction from proteomics raw  
17 data: An evaluation of nine tandem MS tools using a large Orbitrap data set. *J Proteomics* **75**:  
18 5293-5303.  
19
- 20 Markert S, Gardebrecht A, Felbeck H, Sievert SM, Klose J, Becher D *et al.* (2011). Status quo  
21 in physiological proteomics of the uncultured *Riftia pachyptila* endosymbiont. *Proteomics* **11**:  
22 3106-3117.  
23
- 24 Martins E, Figueras A, Novoa B, Santos RS, Moreira R, Bettencourt R. (2014). Comparative  
25 study of immune responses in the deep-sea hydrothermal vent mussel *Bathymodiolus azoricus*  
26 and the shallow-water mussel *Mytilus galloprovincialis* challenged with *Vibrio* bacteria. *Fish*  
27 *Shellfish Immun* **40**: 485-499.  
28
- 29 Moller S, Croning MDR, Apweiler R. (2001). Evaluation of methods for the prediction of  
30 membrane spanning regions. *Bioinformatics* **17**: 646-653.  
31
- 32 Mueller RS, Denev VJ, Kalnejais LH, Suttle KB, Thomas BC, Wilmes P *et al.* (2010). Ecological  
33 distribution and population physiology defined by proteomics in a natural microbial community.  
34 *Mol Syst Biol* **6**: 374.  
35
- 36 Murrell JC, Dalton H. (1983). Ammonia Assimilation in *Methylococcus capsulatus* (Bath) and  
37 Other Obligate Methanotrophs. *J Gen Microbiol* **129**: 1197-1206.  
38
- 39 Muyzer G, Teske A, Wirsén CO, Jannasch HW. (1995). Phylogenetic Relationships of  
40 *Thiomicrospira* Species and Their Identification in Deep-Sea Hydrothermal Vent Samples by  
41 Denaturing Gradient Gel-Electrophoresis of 16S rDNA Fragments. *Arch Microbiol* **164**: 165-  
42 172.  
43
- 44 Neckers L, Tatu U. (2008). Molecular Chaperones in Pathogen Virulence: Emerging New  
45 Targets for Therapy. *Cell Host Microbe* **4**: 519-527.  
46
- 47 Nguyen HH, de la Tour CB, Toueille M, Vannier F, Sommer S, Servant P. (2009). The essential  
48 histone-like protein HU plays a major role in *Deinococcus radiodurans* nucleoid compaction.  
49 *Mol Microbiol* **73**: 240-252.  
50
- 51 Overbeek R, Olson R, Pusch GD, Olsen GJ, Davis JJ, Disz T *et al.* (2014). The SEED and the  
52 Rapid Annotation of microbial genomes using Subsystems Technology (RAST). *Nucleic Acids*  
53 *Res* **42**: D206-214.  
54

- 1 Pernthaler A, Pernthaler J, Amann R. (2002). Fluorescence in situ hybridization and catalyzed  
2 reporter deposition for the identification of marine bacteria. *Appl Environ Microbiol* **68**: 3094-  
3 3101.
- 4
- 5 Petersen JM, Dubilier N. (2009). Methanotrophic symbioses in marine invertebrates. *Environ*  
6 *Microbiol Rep* **1**: 319-335.
- 7
- 8 Petersen JM, Zielinski FU, Pape T, Seifert R, Moraru C, Amann R *et al.* (2011a). Hydrogen is  
9 an energy source for hydrothermal vent symbioses. *Nature* **476**: 176-180.
- 10
- 11 Petersen TN, Brunak S, von Heijne G, Nielsen H. (2011b). SignalP 4.0: discriminating signal  
12 peptides from transmembrane regions. *Nat Methods* **8**: 785-786.
- 13
- 14 Pieja AJ, Rostkowski KH, Criddle CS. (2011a). Distribution and selection of poly-3-  
15 hydroxybutyrate production capacity in methanotrophic proteobacteria. *Microb Ecol* **62**: 564-  
16 573.
- 17
- 18 Pieja AJ, Sundstrom ER, Criddle CS. (2011b). Poly-3-hydroxybutyrate metabolism in the type  
19 II methanotroph *Methylocystis parvus* OBBP. *Appl Environ Microbiol* **77**: 6012-6019.
- 20
- 21 Prasad J, McJarrow P, Gopal P. (2003). Heat and osmotic stress responses of probiotic  
22 *Lactobacillus rhamnosus* HN001 (DR20) in relation to viability after drying. *Appl Environ*  
23 *Microbiol* **69**: 917-925.
- 24
- 25 Pruski AM, Rousse N, Fiala-Médioni A, Boulègue J. (2002). Sulphur signature in the  
26 hydrothermal vent mussel *Bathymodiolus azoricus* from the Mid-Atlantic Ridge. *J Mar Biol*  
27 *Assoc UK* **82**: 463-468.
- 28
- 29 Pruski AM, Dixon DR. (2003). Toxic vents and DNA damage: first evidence from a naturally  
30 contaminated deep-sea environment. *Aquat Toxicol* **64**: 1-13.
- 31
- 32 Rousse N, Boulegue J, Cosson RP, Fiala-Medioni A. (1998). Bioaccumulation des métaux  
33 chez le mytilidae hydrothermal *Bathymodiolus* sp. de la ride médio-atlantique. *Oceanol Acta*  
34 **21**: 597-607.
- 35
- 36 Sampson TR, Weiss DS. (2013). Alternative Roles for CRISPR/Cas Systems in Bacterial  
37 Pathogenesis. *PLoS Pathog* **9**: e1003621.
- 38
- 39 Sarradin PM, Caprais JC, Riso R, Kerouel R, Aminot A. (1999). Chemical environment of the  
40 hydrothermal mussel communities in the Lucky Strike and Menez Gwen vent fields, Mid  
41 Atlantic ridge. *Cah Biol Mar* **40**: 93-104.
- 42
- 43 Sauve V, Bruno S, Berks BC, Hemmings AM. (2007). The SoxYZ complex carries sulfur cycle  
44 intermediates on a peptide swinging arm. *J Biol Chem* **282**: 23194-23204.
- 45
- 46 Sayavedra L, Kleiner M, Ponnudurai RP, Wetzel S, Pelletier E, Barbe V *et al.* (2015). Abundant  
47 toxin-related genes in the genomes of beneficial symbionts from deep-sea hydrothermal vent  
48 mussels. *eLife* **4**: e07966.
- 49
- 50 Scott KM, Sievert SM, Abril FN, Ball LA, Barrett CJ, Blake RA *et al.* (2006). The genome of  
51 deep-sea vent chemolithoautotroph *Thiomicrospira crunogena* XCL-2. *PLoS Biol* **4**: e383.
- 52
- 53 Shibata H, Takahashi M, Yamaguchi I, Kobayashi S. (2001). Efficient removal of sulfide  
54 following integration of multiple copies of the sulfide-quinone oxidoreductase gene (*sqr*) into  
55 the *Escherichia coli* chromosome. *J Biosci Bioeng* **91**: 493-499.



- 1  
2 Spurio R, Durrenberger M, Falconi M, La Teana A, Pon CL, Gualerzi CO. (1992). Lethal  
3 overproduction of the *Escherichia coli* nucleoid protein H-NS: ultramicroscopic and molecular  
4 autopsy. *Mol Gen Genet* **231**: 201-211.  
5  
6 Swan BK, Martinez-Garcia M, Preston CM, Sczyrba A, Woyke T, Lamy D *et al.* (2011).  
7 Potential for Chemolithoautotrophy Among Ubiquitous Bacteria Lineages in the Dark Ocean.  
8 *Science* **333**: 1296-1300.  
9  
10 Takeuchi T, Kawashima T, Koyanagi R, Gyoja F, Tanaka M, Ikuta T *et al.* (2012). Draft genome  
11 of the pearl oyster *Pinctada fucata*: a platform for understanding bivalve biology. *DNA Res* **19**:  
12 117-130.  
13  
14 Tapley DW, Buettner, G.R., Shick, J.M.,. (1999). Free radicals and chemoluminescence as  
15 products of the spontaneous oxidation of sulfide in seawater, and their biological implications.  
16 *Biol Bull* **196**: 52-56.  
17  
18 Thauer RK. (1998). Biochemistry of methanogenesis: a tribute to Marjory Stephenson. 1998  
19 Marjory Stephenson Prize Lecture. *Microbiology* **144 (Pt 9)**: 2377-2406.  
20  
21 Tusher VG, Tibshirani R, Chu G. (2001). Significance analysis of microarrays applied to the  
22 ionizing radiation response. *Proc Natl Acad Sci USA* **98**: 5116-5121.  
23  
24 UniProt-Consortium. (2015). UniProt: a hub for protein information. *Nucleic Acids Res* **43**:  
25 D204-212.  
26  
27 van der Oost J, Jore MM, Westra ER, Lundgren M, Brouns SJJ. (2009). CRISPR-based  
28 adaptive and heritable immunity in prokaryotes. *Trends Biochem Sci* **34**: 401-407.  
29  
30 Vasu K, Nagaraja V. (2013). Diverse functions of restriction-modification systems in addition  
31 to cellular defense. *Microbiol Mol Biol Rev* **77**: 53-72.  
32  
33 Vetriani C, Voordeckers JW, Crespo-Medina M, O'Brien CE, Giovannelli D, Lutz RA. (2014).  
34 Deep-sea hydrothermal vent Epsilonproteobacteria encode a conserved and widespread  
35 nitrate reduction pathway (Nap). *ISME J* **8**: 1510-1521.  
36  
37 Vizcaíno JA, Csordas A, del-Toro N, Dianas JA, Griss J, Lavidas I *et al.* (2016). 2016 update  
38 of the PRIDE database and its related tools. *Nucleic Acids Res* **44**: D447-D456.  
39  
40 Vorholt JA, Marx CJ, Lidstrom ME, Thauer RK. (2000). Novel formaldehyde-activating enzyme  
41 in *Methylobacterium extorquens* AM1 required for growth on methanol. *J Bacteriol* **182**: 6645-  
42 6650.  
43  
44 Vorholt JA. (2002). Cofactor-dependent pathways of formaldehyde oxidation in methylotrophic  
45 bacteria. *Arch Microbiol* **178**: 239-249.  
46  
47 Walsh DA, Zaikova E, Howes CG, Song YC, Wright JJ, Tringe SG *et al.* (2009). Metagenome  
48 of a Versatile Chemolithoautotroph from Expanding Oceanic Dead Zones. *Science* **326**: 578-  
49 582.  
50  
51 Wang G, Maier RJ. (2015). Bacterial histone-like proteins: roles in stress resistance. *Curr*  
52 *Genet* **61**: 489-492.  
53

- 1 Ward N, Larsen O, Sakwa J, Bruseth L, Khouri H, Durkin AS *et al.* (2004). Genomic insights  
2 into methanotrophy: The complete genome sequence of *Methylococcus capsulatus* (Bath).  
3 *PLoS Biol* **2**: 1616-1628.  
4
- 5 Warnecke T, Supek F, Lehner B. (2012). Nucleoid-associated proteins affect mutation  
6 dynamics in *E. coli* in a growth phase-specific manner. *PLoS Comput Biol* **8**: e1002846.  
7
- 8 Widdel F, Pfennig N. (1981). Studies on Dissimilatory Sulfate-Reducing Bacteria That  
9 Decompose Fatty-Acids.1. Isolation of New Sulfate-Reducing Bacteria Enriched with Acetate  
10 from Saline Environments - Description of *Desulfobacter postgatei* gen. nov. sp. nov. *Arch*  
11 *Microbiol* **129**: 395-400.  
12
- 13 Widdel F, Kohring G-W, Mayer F. (1983). Studies on dissimilatory sulfate-reducing bacteria  
14 that decompose fatty acids III. Characterization of the filamentous gliding *Desulfonema limicola*  
15 gen. nov. sp. nov., and *Desulfonema magnum* sp. nov. *Arch Microbiol* **134**: 286-294.  
16
- 17 Young JC, Dill BD, Pan CL, Hettich RL, Banfield JF, Shah M *et al.* (2012). Phage-Induced  
18 Expression of CRISPR-Associated Proteins Is Revealed by Shotgun Proteomics in  
19 *Streptococcus thermophilus*. *PLoS ONE* **7**: e38077.  
20
- 21 Yu NY, Wagner JR, Laird MR, Melli G, Rey S, Lo R *et al.* (2010). PSORTb 3.0: improved  
22 protein subcellular localization prediction with refined localization subcategories and predictive  
23 capabilities for all prokaryotes. *Bioinformatics* **26**: 1608-1615.  
24
- 25 Zielinski FU, Gennerich HH, Borowski C, Wenzhofer F, Dubilier N. (2011). In situ  
26 measurements of hydrogen sulfide, oxygen, and temperature in diffuse fluids of an ultramafic-  
27 hosted hydrothermal vent field (Logatchev, 14 degrees 45 ' N, Mid-Atlantic Ridge): Implications  
28 for chemosymbiotic bathymodiolin mussels. *Geochem Geophys Geosy* **12**: Q0AE04.  
29  
30  
31
