# Supplementary material for: Metabolic and physiological interdependencies in the Bathymodiolus azoricus symbiosis
Source: PubMed Central journal article supplement — ISME J. 2016 Nov 1;11(2):463–77. doi: 10.1038/ismej.2016.124 (PMC5270565; doi:10.1038/ismej.2016.124), 2016-11-01
Supplement: ismej2016124x2.pdf [file ismej2016124x2.pdf]

**Supplementary Table S1A: Overview of sampling sites, dates and biological replicate numbers of samples analyzed in this study.** All mussel specimens analyzed in this study were collected at hydrothermal vent fields along the Mid-Atlantic Ridge. For method details see Methods sections in the main text and in the Supplementary Information. MOX: methane-oxidizing. For details of individual proteomic measurements see Supplementary Table S5B below.

| Analysis                                                | Host species             | Sampling time                      | Sampling site                                                                                                           | Number of specimens (= biological replicates) |
|---------------------------------------------------------|--------------------------|------------------------------------|-------------------------------------------------------------------------------------------------------------------------|-----------------------------------------------|
| CARD-FISH analysis                                      | <i>B. azoricus</i>       | 09/10 2010: RV Meteor cruise M82-3 | Menez Gwen, 37°50'41" N, 31°31'10" W                                                                                    | 3                                             |
| Proteome analysis (Orbitrap)                            | <i>B. azoricus</i>       | 09/10 2010: RV Meteor cruise M82-4 | Menez Gwen, 37°50'41" N, 31°31'10" W                                                                                    | 3                                             |
| Proteome analysis (Velos)                               | <i>B. azoricus</i>       | 09/10 2010: RV Meteor cruise M82-5 | Menez Gwen, 37°50'41" N, 31°31'10" W                                                                                    | 2                                             |
| <i>B. azoricus</i> MOX symbiont genome sequencing       | <i>B. azoricus</i>       | 08/09 2006: MoMARETO cruise        | Menez Gwen, 37°45'35" N, 31°38'15.6" W                                                                                  | 1                                             |
| <i>Bathymodiolus</i> sp. MOX symbiont genome sequencing | <i>Bathymodiolus</i> sp. | 04/05 2009: RV Meteor cruise M78-2 | Lilliput, 09°32'50.9" S, 13°12'33.3" W, station ME782/335; Foggy Corner, 4°48'9.7" S, 12°22'16.79" W, station ME782/274 | 2                                             |

**Supplementary Table S1B: Overview of proteomic analyses performed in this study.** MS measurements were performed in two parallel approaches, using i) the LTQ Orbitrap Classic mass spectrometer ("Orbitrap", and ii) for enhanced resolution, the highly sensitive LTQ Orbitrap Velos mass spectrometer ("Velos"). Protein raw extracts from gradient pellet and gill tissue were furthermore subdivided into the soluble protein fraction and the membrane-associated protein fraction. All measurements were run in 2 or 3 biological replicates, i.e. with symbionts isolated from 2 or 3 individual host specimens (no technical replicates were run). For method details see Methods sections in the main text and in the Supplementary Information.

| Sample type                                                     | Subcellular protein fraction | MS Method | Number of biological replicates |
|-----------------------------------------------------------------|------------------------------|-----------|---------------------------------|
| Gradient pellet (enriched symbiont fraction)                    | soluble proteins             | Velos     | 2                               |
| Gradient pellet (enriched symbiont fraction)                    | soluble proteins             | Orbitrap  | 3                               |
| Gradient pellet (enriched symbiont fraction)                    | membrane proteins            | Orbitrap  | 3                               |
| Supernatant (enriched host fraction)                            | soluble proteins             | Velos     | 2                               |
| Supernatant (enriched host fraction)                            | soluble proteins             | Orbitrap  | 3                               |
| Gill tissue                                                     | soluble proteins             | Velos     | 2                               |
| Gill tissue                                                     | membrane proteins            | Orbitrap  | 2                               |
| Foot tissue                                                     | soluble proteins             | Velos     | 2                               |
| <i>Total number of MS measurements performed in this study:</i> |                              |           | 19                              |
